# Supplementary material
Source: Springer Nature journal article supplement (https://www.springermedizin.de/resource/supplementary/12943_2010_884_MOESM2_ESM.PDF/9551950)
Supplement: MOESM2 [file 9551950]

A

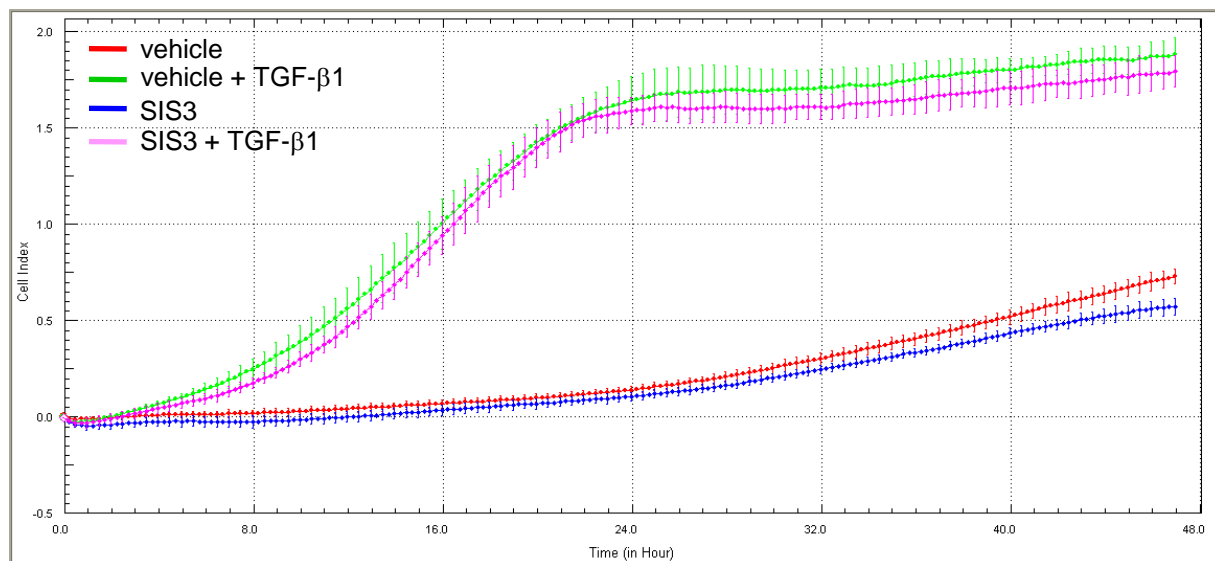

Legend to Figure S2A: **Effect of Smad3 inhibition on TGF- $\beta$ 1-induced cell migration in COLO 357 cells.**

A, COLO 357 cells (60,000 cells/well) were subjected to xCELLigence real-time cell migration assay in the presence or absence of TGF- $\beta$ 1 and SIS3, a pharmacologic Smad3 inhibitor that has been shown not to cross-inhibit Smad2. Data represent the means  $\pm$  standard deviations from quadruplicate wells. One out of two experiments is shown. Data points of the green and pink curves were not significantly different.

B

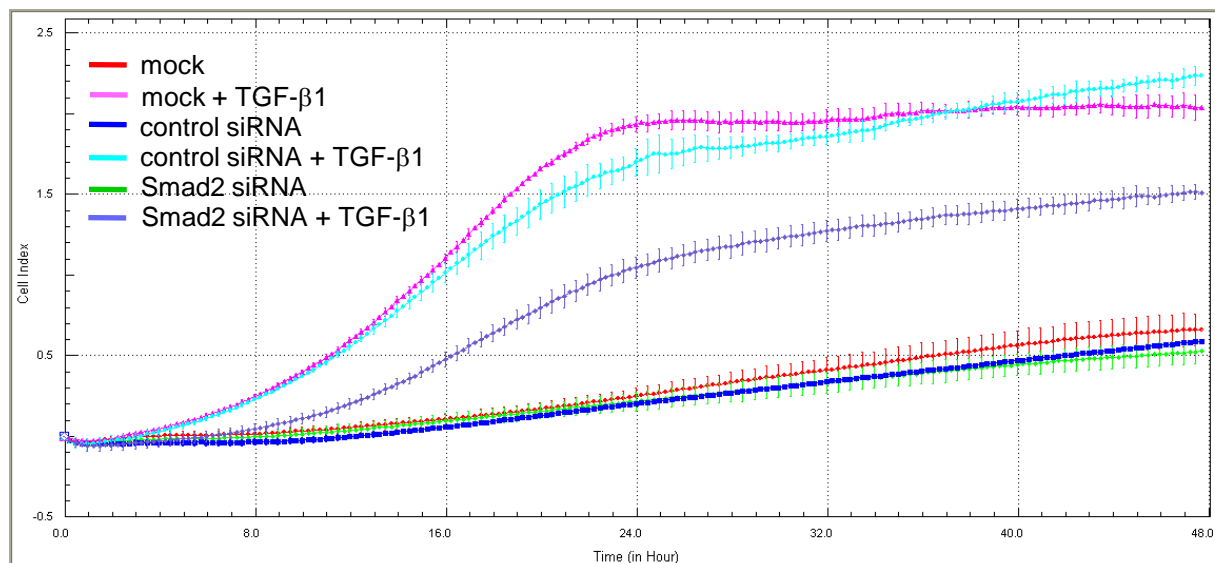

Legend to Figure S2B: **Smad2 depletion inhibits TGF- $\beta$ 1-induced cell migration in COLO 357 cells.**

A, COLO 357 cells (60,000 cells/well) were transiently transfected with control siRNA or Smad2-specific siRNA and subjected to xCELLigence real-time cell migration assay in the presence or absence of TGF- $\beta$ 1. Data represent the means  $\pm$  standard deviations from quadruplicate wells. One representative experiment from three experiments is shown. Data points of the Smad2 siRNA transfected cells were significantly different from those of the mock and control siRNA transfected cells.
